# Supplementary material for: Homeostatic and pathogenic roles of GM3 ganglioside molecular species in TLR4 signaling in obesity
Source: PubMed Central journal article supplement (PMC7298289; doi:10.15252/embj.2019101732), 2020-05-07
Supplement: EMBJ-39-e101732-s002.pdf [file EMBJ-39-e101732-s002.pdf]

## Expanded View Figures

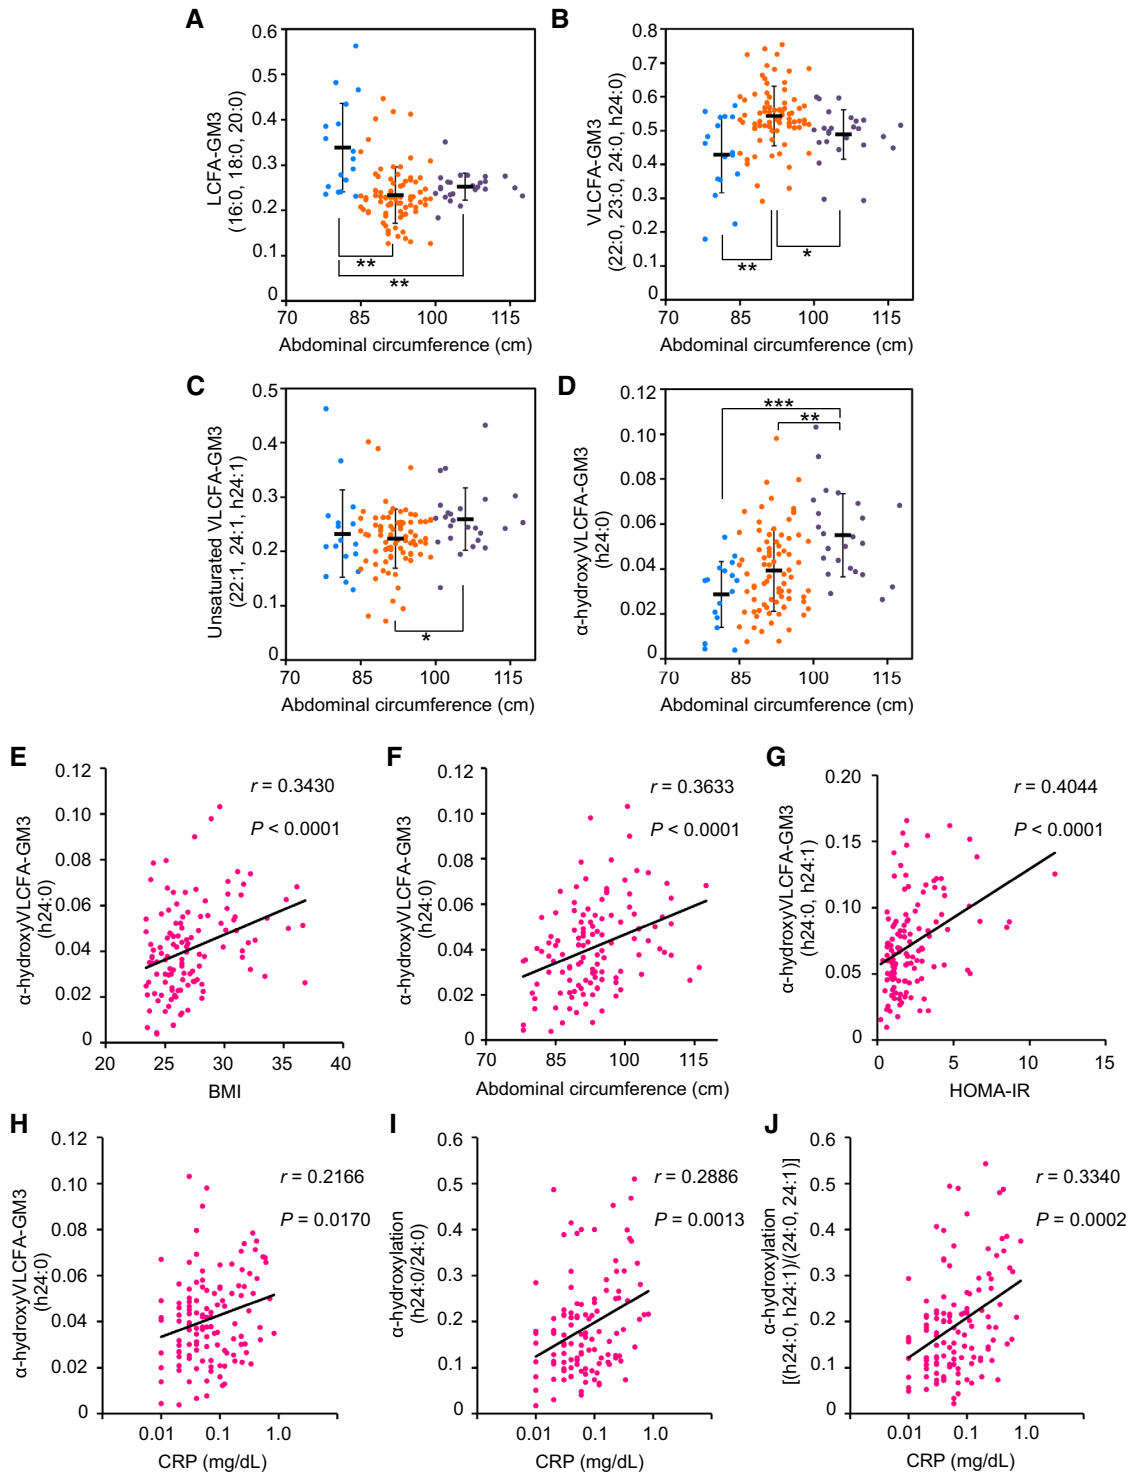

Figure EV1.

**Figure EV1. Properties of various GM3 species as a function of clinical markers of metabolic disorders and chronic inflammation.**

A–D LCFA species (A), VLCFA species (B), unsaturated VLCFA species (C), and  $\alpha$ -hydroxy VLCFA-GM3 (h24:0) (D). Colors indicate disease severity: light blue, no abnormal scores ( $n = 17$ ); orange, early-phase obesity ( $n = 80$ ); purple, severe obesity ( $n = 25$ ). Data shown are mean  $\pm$  SD, analyzed by two-tailed unpaired *t*-test with Bonferroni's correction. \* $P < 0.05$ , \*\* $P < 0.01$ , and \*\*\* $P < 0.001$  for comparisons between indicated groups.

E–J Spearman's correlations for GM3 h24:0 vs. BMI (E), GM3 h24:0 vs. abdominal circumference (F), total of  $\alpha$ -hydroxy GM3 (h24:0 and h24:1) vs. HOMA-IR (G), GM3 h24:0 vs. serum CRP (H),  $\alpha$ -hydroxylation rate (h24:0 to 24:0) vs. serum CRP (I), and  $\alpha$ -hydroxylation rate (h24:0 and h24:1 to 24:0 and 24:1) vs. serum CRP (J).

Data information: Sample sizes: (A–G),  $n = 122$ ; (H–J),  $n = 121$ .

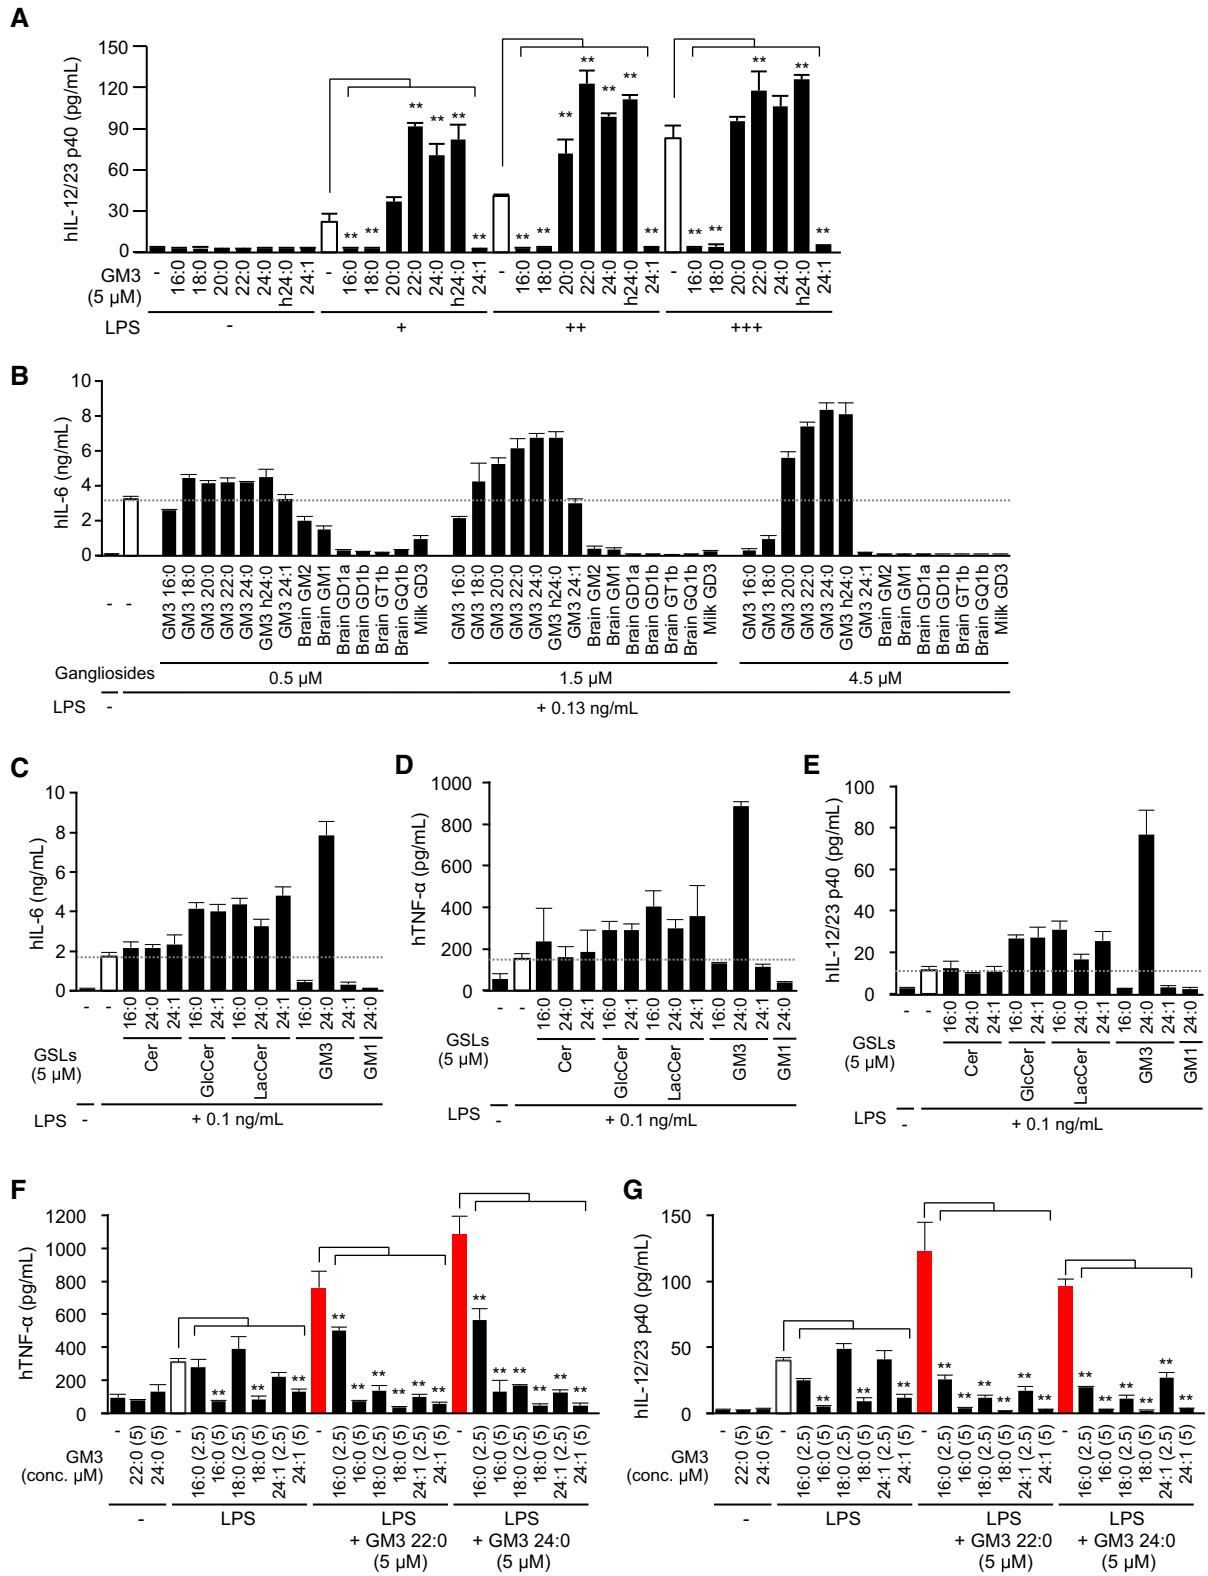

Figure EV2.

**◀ Figure EV2. Positive and negative regulation of innate immune response by GM3 gangliosides.**

- A GM3-mediated enhancement and inhibition of IL-12/23 production from LPS-stimulated monocytes (measured by ELISA).
- B Co-stimulation of monocytes by LPS plus GM3 species or complex ganglioside species. IL-6 production in culture supernatant was measured by ELISA.
- C–E Co-stimulation of monocytes by LPS plus GM3 species or precursor GSL species. The production of IL-6 (C), TNF- $\alpha$  (D), and IL-12/23 p40 (E) in culture supernatant was measured by ELISA.
- F, G Inhibitory effect of LCFA and unsaturated VLCFA-GM3 on VLCFA-GM3 species. The production of TNF- $\alpha$  (F) and IL-12/23 p40 (G) in culture supernatant was measured by ELISA.

Data information: Data shown are mean  $\pm$  SD ( $n = 3$ ) analyzed by Tukey's multiple comparison test.  $**P < 0.01$  for comparison with LPS stimulation without GM3 species (A), or co-stimulation by LPS and proinflammatory GM3 (22:0, 24:0) (F, G).

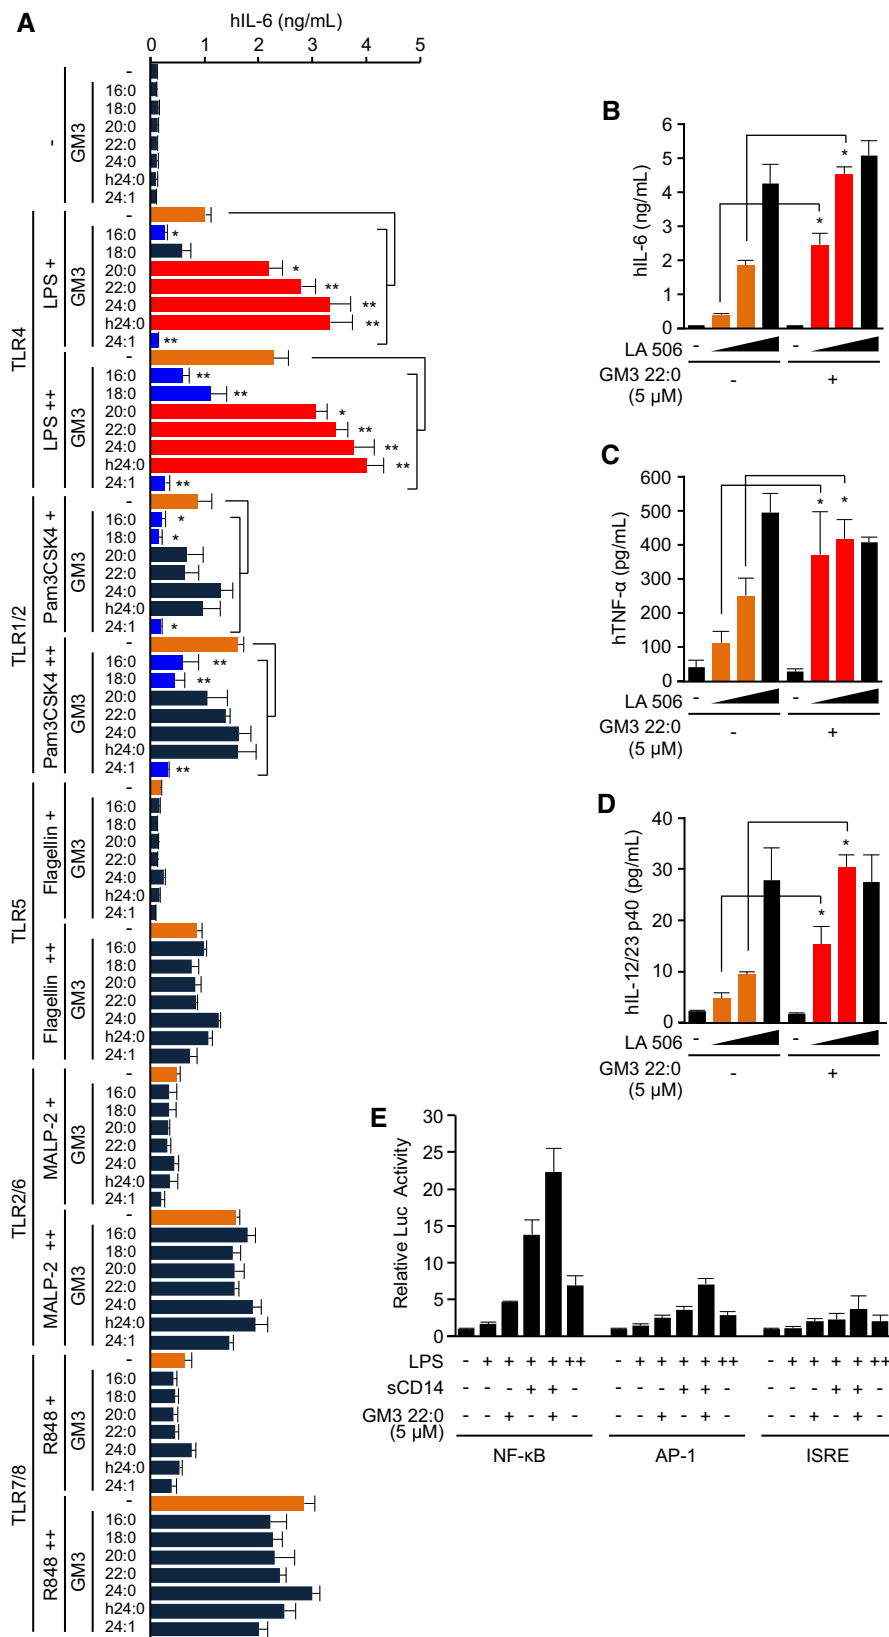

**Figure EV3. VLCFA-GM3 species synergistically and selectively control human TLR4/MD-2 activation.**

**A** Co-stimulation of human monocytes by GM3 species plus various TLR ligands: LPS (0.13, 0.25 ng/ml), TLR4/MD-2, Pam3CSK4 (0.25, 0.5  $\mu$ g/ml), TLR1/2, Flagellin (10, 50 ng/ml), TLR5, R848 (0.25, 0.5  $\mu$ g/ml), TLR7/8, MALP-2 (0.5, 1.0 ng/ml), and TLR2/6. IL-6 production in culture supernatant was quantified by ELISA.

**B-D** Production of IL-6 (B), TNF- $\alpha$  (C), and IL-12/23 p40 (D) in culture supernatant following co-stimulation of monocytes by GM3 species plus LA506 (synthetic TLR4 ligand) (3, 10, 30 ng/ml).

**E** Relative luciferase reporter activities of NF- $\kappa$ B, AP-1, and ISRE in response to LPS (+, 5 ng/ml; ++, 1  $\mu$ g/ml), sCD14 (1  $\mu$ g/ml), GM3 22:0 (5  $\mu$ M), and their combinations. Relative luciferase activity of control condition was defined as 1 for every reporter gene.

Data information: Data shown are mean  $\pm$  SD ( $n = 3$ , A-D;  $n = 4$ , E) analyzed by Tukey's multiple comparison test (A) or by two-tailed unpaired  $t$ -test (B-D). \* $P < 0.05$  and \*\* $P < 0.01$  for comparisons between indicated groups.

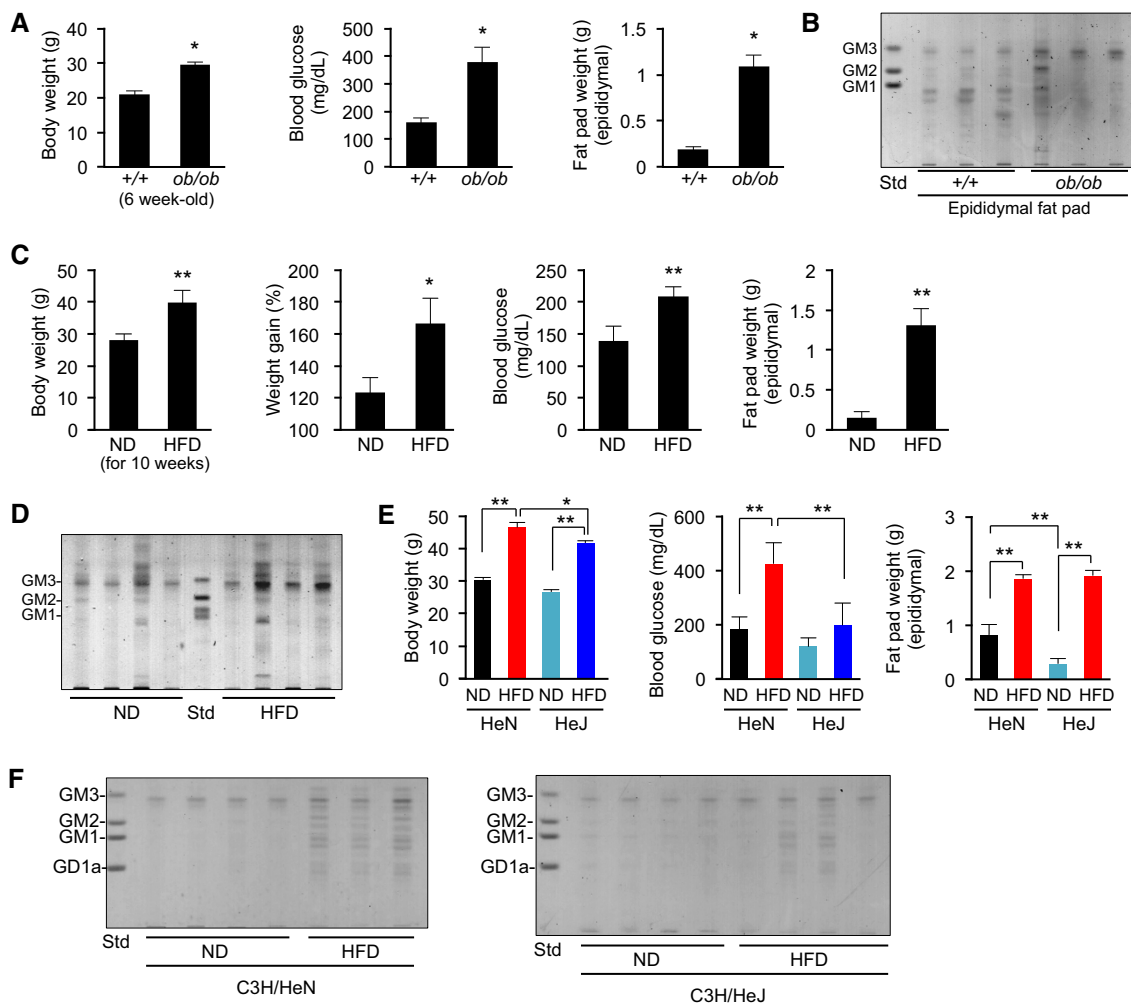

**Figure EV4. GM3 ganglioside in adipose tissue showed increased abundance in early-phase obesity and short-term HFD.**

- A Body weight, blood glucose, and epididymal fat pad weight of 6-week-old control C57/BL6 mice and *ob/ob* mice ( $n = 3$ ).
- B Ganglioside species in epididymal fat pad were analyzed by TLC.
- C Body weight, weight gain, blood glucose, and epididymal fat pad weight of normal diet (ND) and high-fat diet (HFD) C57/BL6 mice ( $n = 4$ ).
- D Ganglioside species in epididymal fat pad were analyzed by TLC.
- E Body weight, blood glucose, and epididymal fat pad weight of C3H/HeN mice (ND, HFD) and C3H/HeJ mice (ND, HFD) ( $n = 4$ ).
- F Full-size images of Fig 7C. TLC analysis of acidic GSL fraction (equivalent to 0.1 mg protein) from epididymal fat pads of C3H/HeN and C3H/HeJ mice on ND or HFD for 8 weeks.

Data information: Data shown are mean  $\pm$  SD analyzed by two-tailed unpaired *t*-test (A, C) or by Tukey's multiple comparison test (E). \* $P < 0.05$  and \*\* $P < 0.01$  for comparisons between indicated groups.

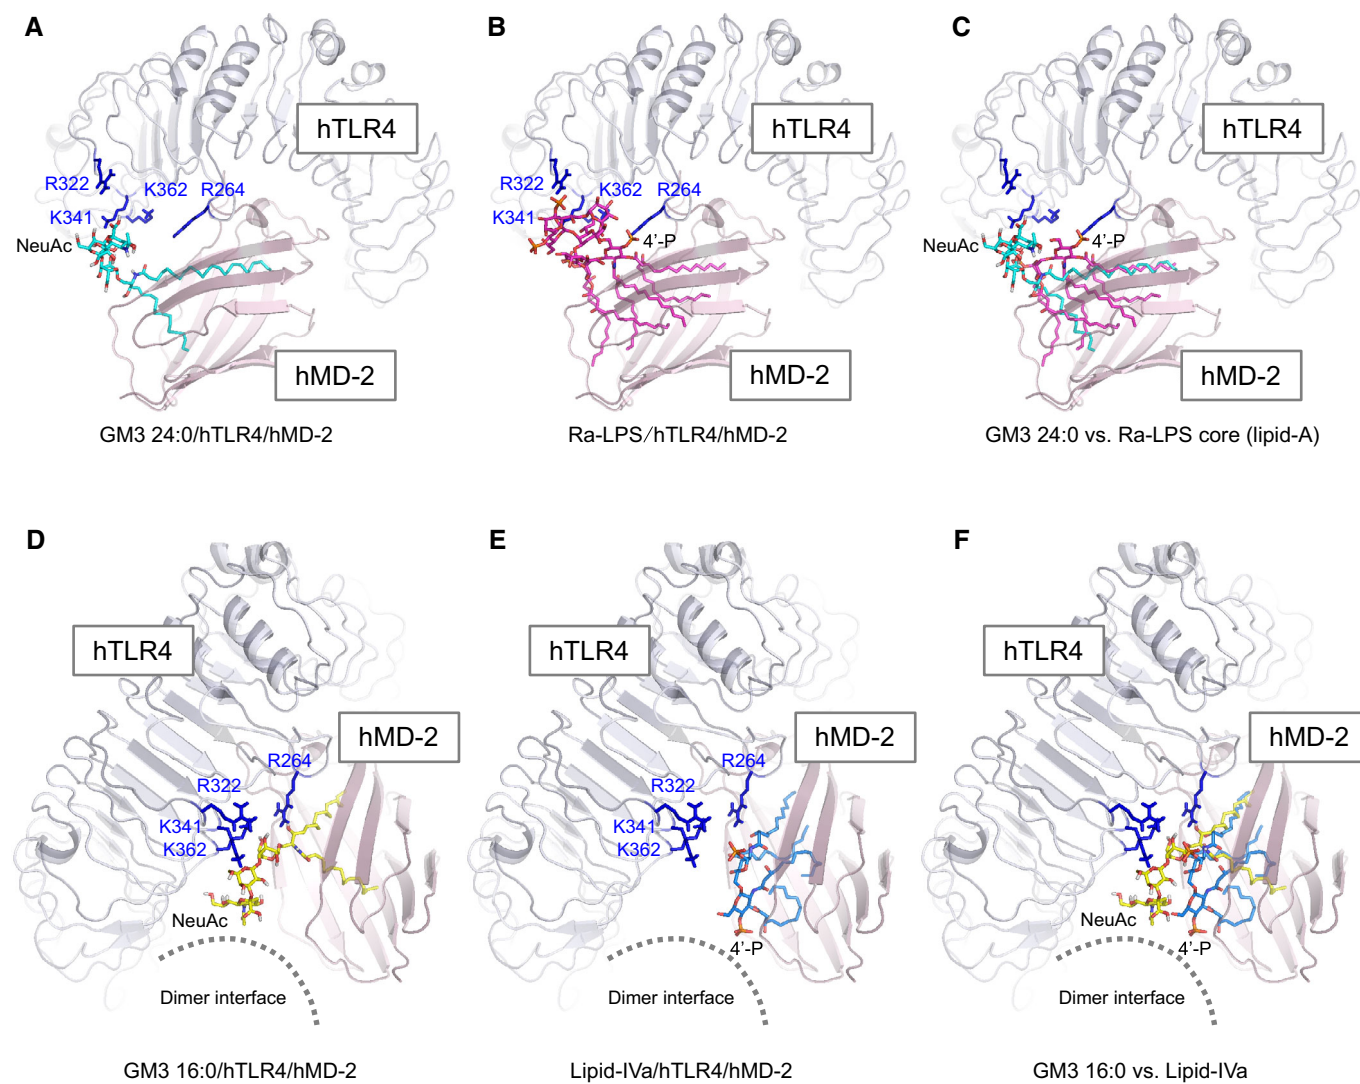

**Figure EV5. Binding model of VLCFA/LCFA-GM3 species on hTLR4/hMD-2 and the comparison to LPS and lipid IVa.**

A–C Docking model of GM3 24:0 (A), Ra-LPS (in 3FXI) (B), and superposition of GM3 24:0 vs. core structure of Ra-LPS (lipid A) (C).

D–F Docking model of GM3 16:0 (D), lipid IVa (in complex with hMD-2 in 2E59) (E), and superposition of GM3 16:0 vs. lipid IVa (F). Basic residues of hTLR4 are colored in blue.
